# Supplementary material
Source: PubMed Central journal article supplement (PMC3657330)

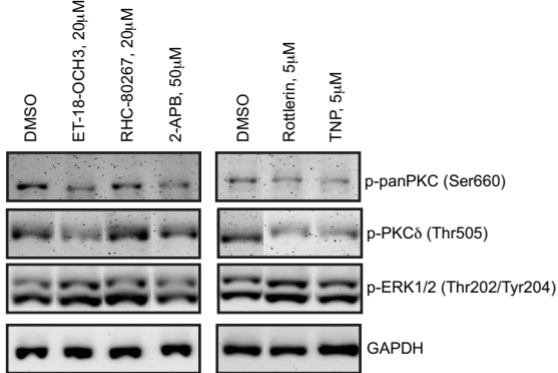

**Supplementary Information Figure S2**

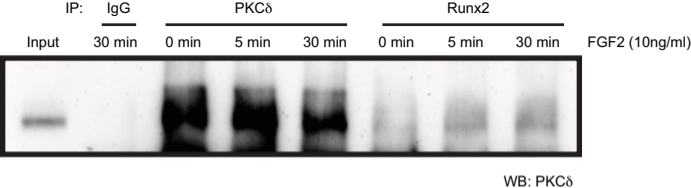

**Supplementary Information Figure S3**

Supplement: NIHMS436341-supplement-Supp_Fig_S1-S3.pdf [file NIHMS436341-supplement-Supp_Fig_S1-S3.pdf]
